# Supplementary material for: A New Mathematical Model for Economic Ordering with Preventive Maintenance and Reworking in a Supply Chain
Source: Hindawi journal article supplement (doi:10.1155/2023/8636482), 2023-03-28
Supplement: f1 [file 8636482.f1.docx]

Prove the convexity of the cost function

After estimating the cost function of the investigated system, it is optimized. In the optimization stage, a wide range of deterministic and innovative methods are available. Regarding the solution space of the estimated function, due to the linearity of the relationships, these constraints form a convex polyhedron, which is always a convex set[18].

To ensure that the solution obtained for this function is the absolute optimum, its convexity/concaveness should be checked. It is worth noting that although the use of heuristic methods does not require this review, despite this, the basic weakness of these methods is that it does not guarantee the optimality of the obtained solutions, it does not even show the distance between the obtained solution and the optimal solution.

In order to ensure that a local solution obtained is also its absolute minimum solution, the convexity of this function will be checked. In fact, in order to use non-linear optimization methods to determine the final optimal solution, the convexity of the cost function must first be proven.

To prove the convexity, we first derive the cost function with respect to Q, which will be as follows:

| (A-1) |  |
| --- | --- |

| (A-2) |  |
| --- | --- |

Due to the convexity of this function, every local optimal solution for it is an absolute optimal solution, as a result, the solution obtained for this function by the software is also a definite optimal solution, so the expected cost function of the total inventory for all non-zero values of Q is convex

As a result, we have:

| (A-3) |  |
| --- | --- |
